# Supplementary material
Source: Springer Nature journal article supplement (https://www.springermedizin.de/resource/supplementary/13047_2013_579_MOESM2_ESM.pdf/9664016)

## Time to recurrence

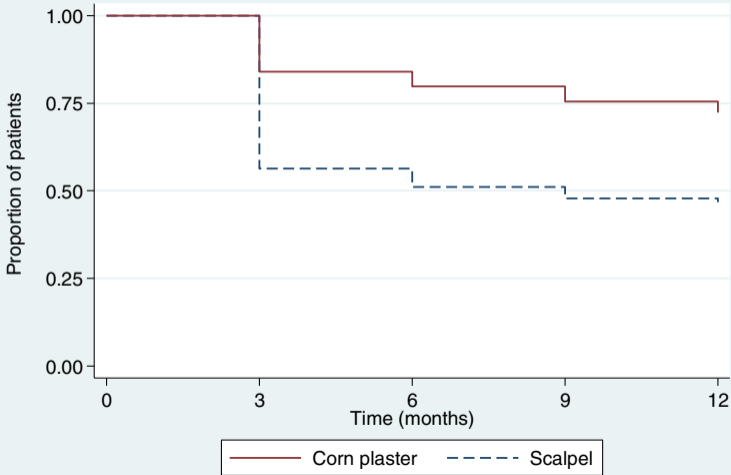

Supplement: MOESM2 [file 9664016]
